# Supplementary material for: Preparation of translucent silicalite-1 bulk ceramics by spark plasma sintering
Source: Royal Society of Chemistry journal article supplement (doi:10.1039/d5ma00075k), 2025-01-01
Supplement: d5ma00075k1.pdf [file d5ma00075k1.pdf]

## Supporting Information

### Preparation of Translucent Silicalite-1 Bulk Ceramics by Spark Plasma

#### Sintering

Masanori Takemoto,<sup>a</sup> Yoshiaki Ito,<sup>a</sup> Yuka Yoshihara,<sup>a</sup> Shiori Odagiri,<sup>b</sup> Yuta Shuseki,<sup>c</sup> Kenta Iyoki,<sup>a</sup> Tatsuya Okubo,<sup>a</sup> Atsunobu Masuno,<sup>b,c</sup> Toru Wakihara<sup>a,d\*</sup>

<sup>a</sup> Department of Chemical System Engineering, The University of Tokyo, 7-3-1 Hongo, Bunkyo-ku, Tokyo 113-8656, Japan.

<sup>b</sup> Graduate School of Science and Technology, Hirosaki University, Hirosaki, Aomori 036-8505 Japan.

<sup>c</sup> Graduate School of Engineering, Kyoto University, Nishikyo-ku, Kyoto 615-8520, Japan.

<sup>d</sup> Institute of Engineering Innovation, The University of Tokyo, 2-11-16 Yayoi, Bunkyo-ku, Tokyo 113-8656, Japan.

\* Corresponding author

|                     |          |
|---------------------|----------|
| <b>Experimental</b> | <b>2</b> |
| <b>Figure S1</b>    | <b>3</b> |
| <b>Figure S2</b>    | <b>4</b> |
| <b>Figure S3</b>    | <b>5</b> |
| <b>Figure S4</b>    | <b>6</b> |
| <b>Reference</b>    | <b>7</b> |

# Experimental

## *Defect-healing treatment for zeolite*

According to our previous report,<sup>[1]</sup>  $\text{NH}_4\text{F}$  was dissolved in a dilute solution of tetraethylammonium hydroxide (TEAOH) to prepare a solution with a molar composition of 1.00 TEAOH: 1.14  $\text{NH}_4\text{F}$ : 15.19  $\text{H}_2\text{O}$ . Calcined silicalite-1 powder was slowly added to this solution at a solid-to-liquid weight ratio of 1:2. The resulting mixture was heated in an autoclave at 170 °C for 24 h. The solid product was collected via filtration, washed with pure water, and dried at 80 °C overnight. The product was calcined at 550 °C for 6 h.

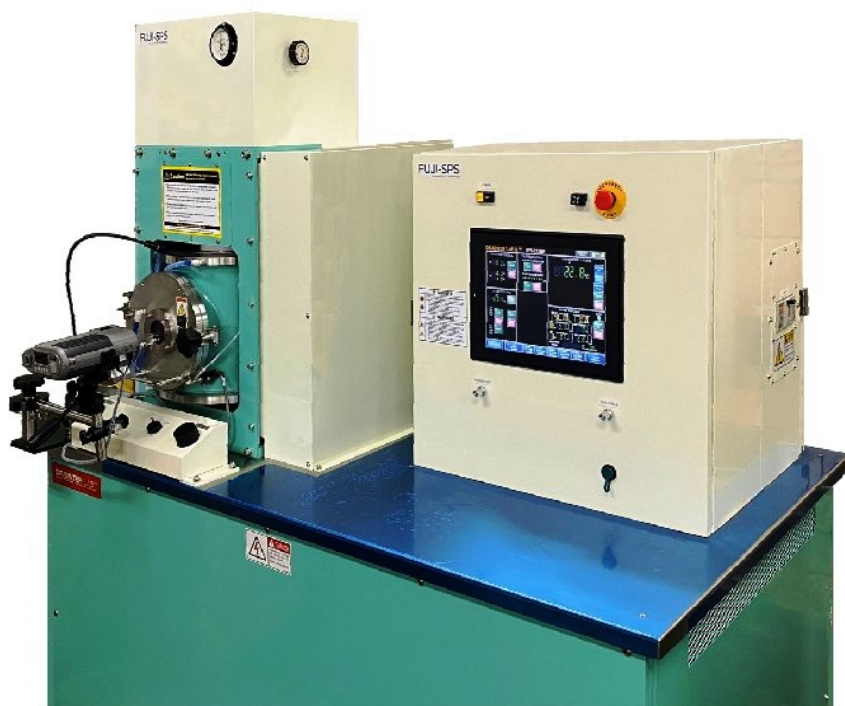

**Figure S1.** Photograph of SPS apparatus.<sup>[2]</sup>

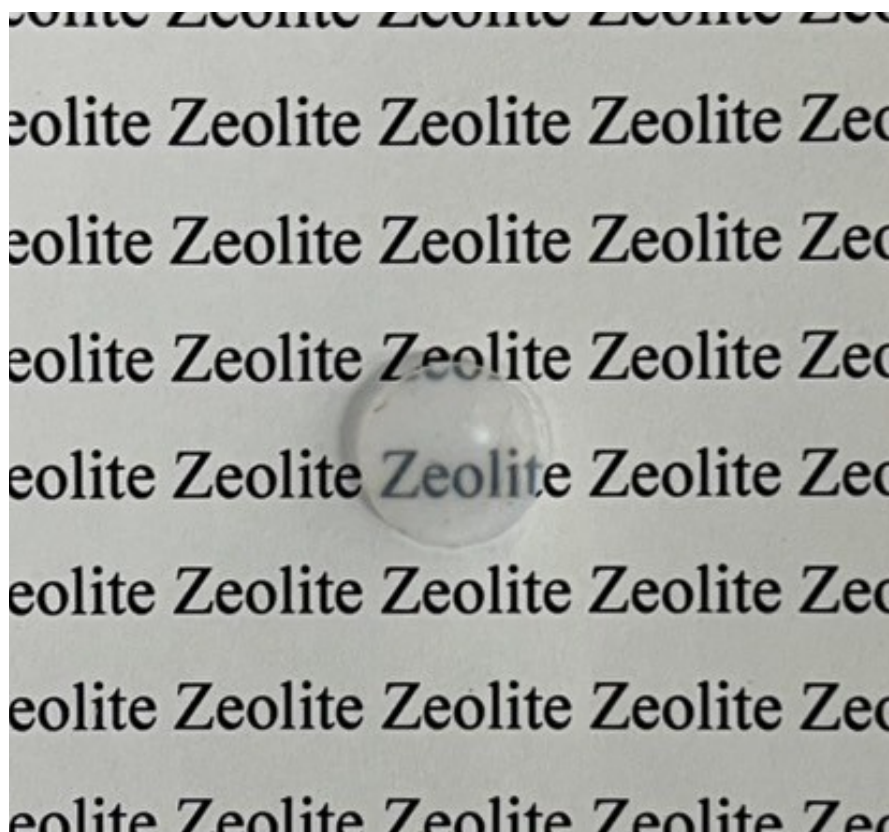

**Figure S2.** Photograph of silicalite-1 ceramic corresponding to the one shown in Figure 1(a) after a drop of water was applied.

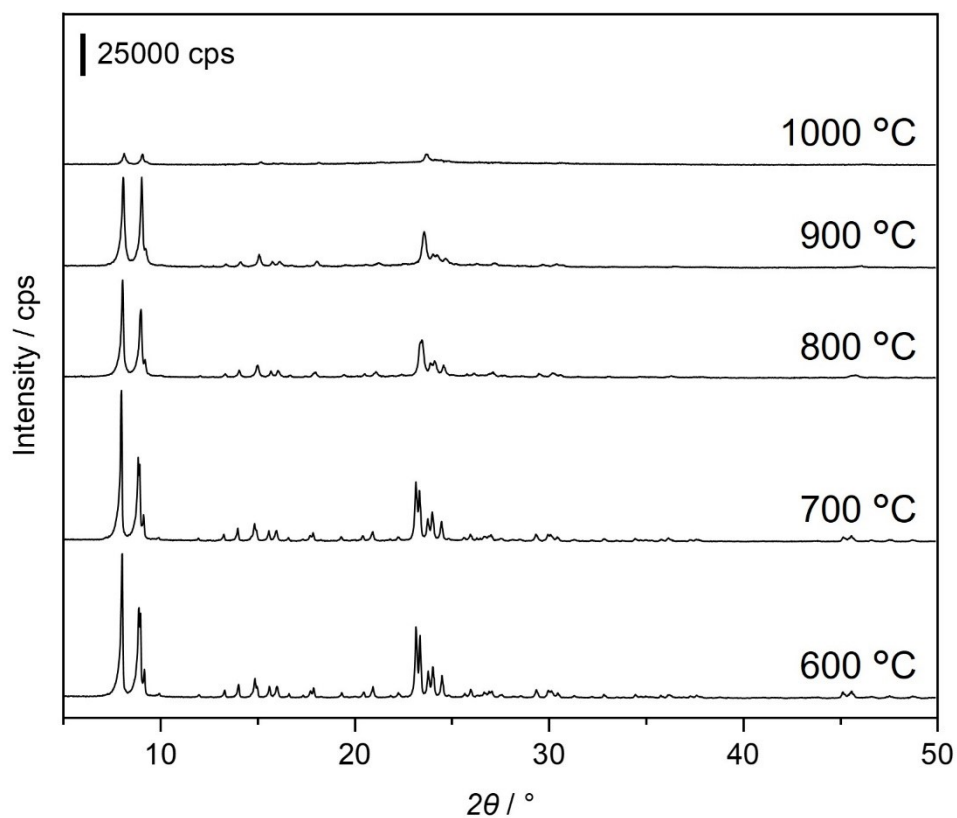

**Figure S3.** PXRD patterns of the samples after SPS treatments, where 890HOA was used as a silica source, and all samples were sintered at 50 MPa for 5 min at varying temperatures using the graphite carbon die. The ramping rate was 70 °C·min<sup>-1</sup>.

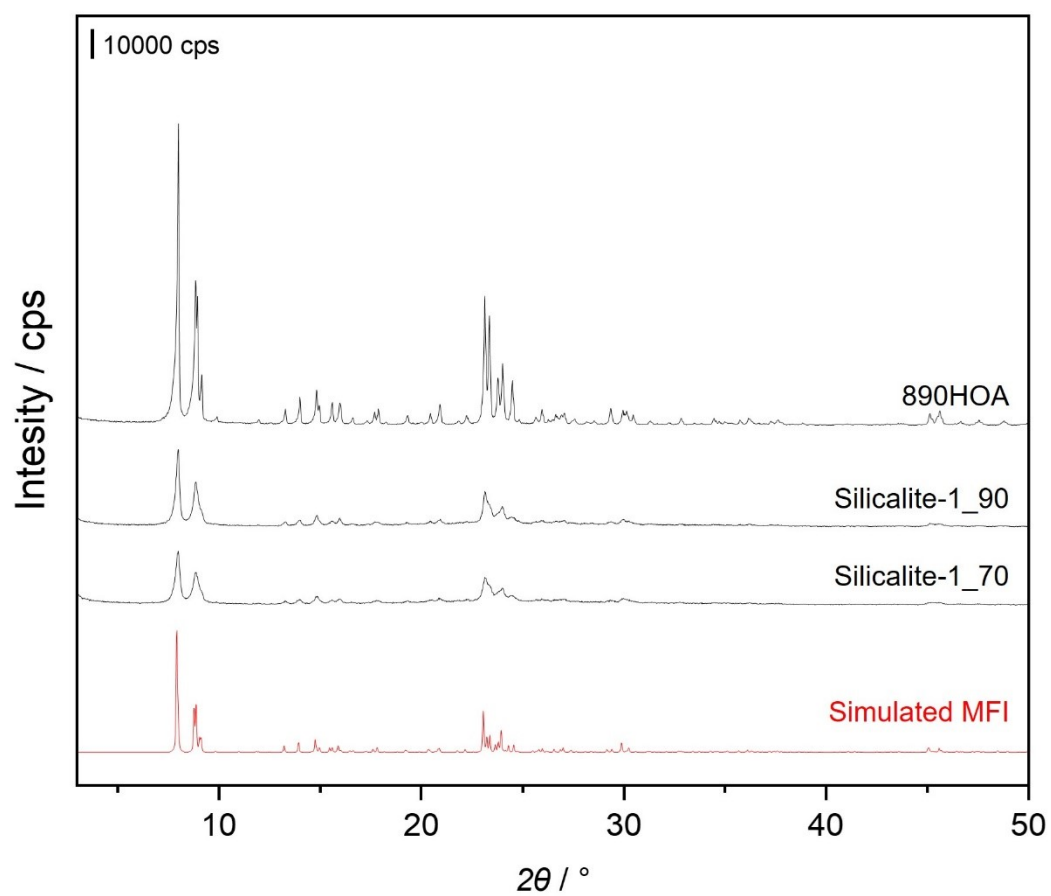

**Figure S4.** PXRD patterns of 890HOA, silicalite-1\_90, and silicalite-1\_70.

# Reference

1. K. Iyoki et al., *J. Am. Chem. Soc.* **2020**, 142, 3931–3938.
2. [https://www.fdc.co.jp/sps/products/labjr/j\\_labjr.html](https://www.fdc.co.jp/sps/products/labjr/j_labjr.html)
